# Supplementary material
Source: PubMed Central journal article supplement (PMC6296221)

**Supplemental figure 1A. Parallelism of the MDK ELISA between the standard curve and serially diluted washout samples.**

Single breast washout sample was serially diluted 5, 10 and 20 fold into assay buffer (TBSTA) and then assayed for MDK. White bars, raw MDK concentration. Black bars, measured MDK value multiplied by the dilution factor.

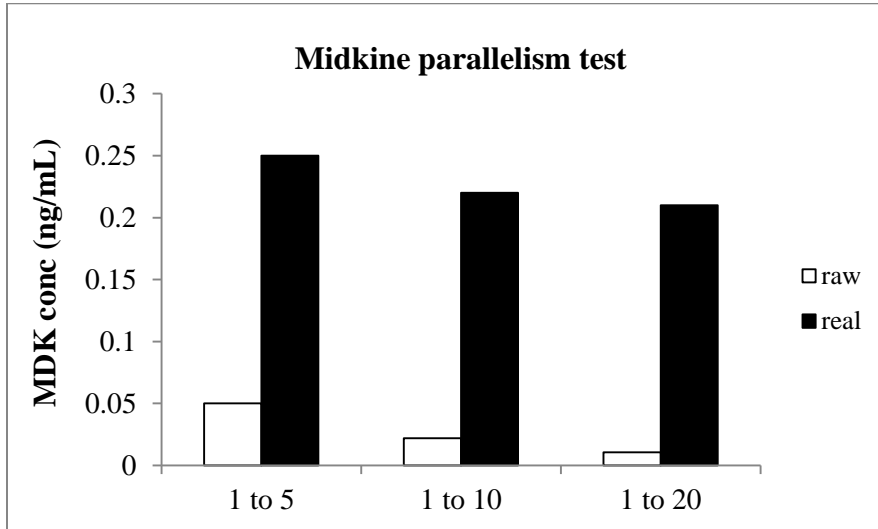

**Supplemental figure 1B. Parallelism of the PTN ELISA between the standard curve and serially diluted washout samples.**

Single breast washout sample was serially diluted 5, 10 and 20 fold into assay buffer (PBSTA) and then assayed for MDK. White bars, raw MDK concentration. Black bars, measured MDK value multiplied by the dilution factor.

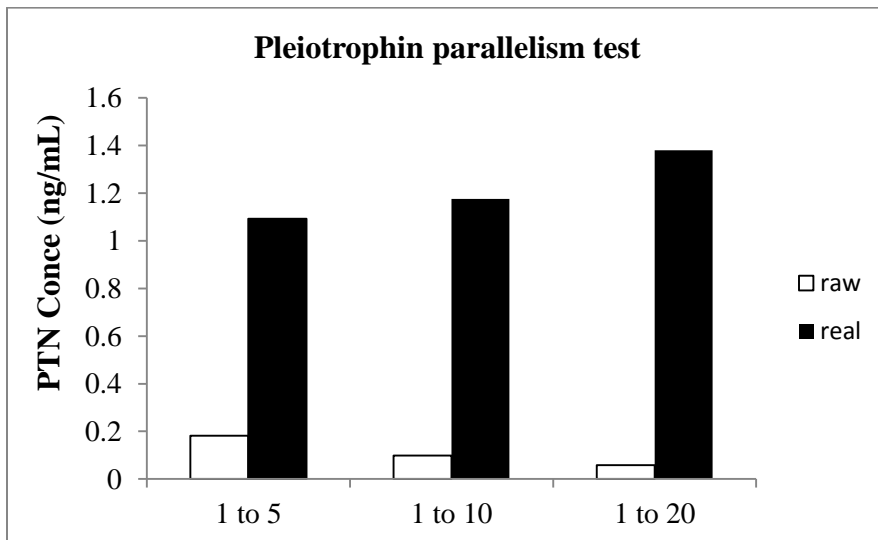

Supplement: NIHMS999504-supplement-1.pdf [file NIHMS999504-supplement-1.pdf]
